# Supplementary material for: Association of Visceral Fat Obesity, Sarcopenia, and Myosteatosis with Non-Alcoholic Fatty Liver Disease without Obesity
Source: PubMed Central journal article supplement — Clin Mol Hepatol. 2023 Jul 5;29(4):987–1001. doi: 10.3350/cmh.2023.0035 (PMC10577332; doi:10.3350/cmh.2023.0035), 2023-07-05
Supplement: cmh-2023-0035-Supplementary-Fig-1.pdf [file cmh-2023-0035-Supplementary-Fig-1.pdf]

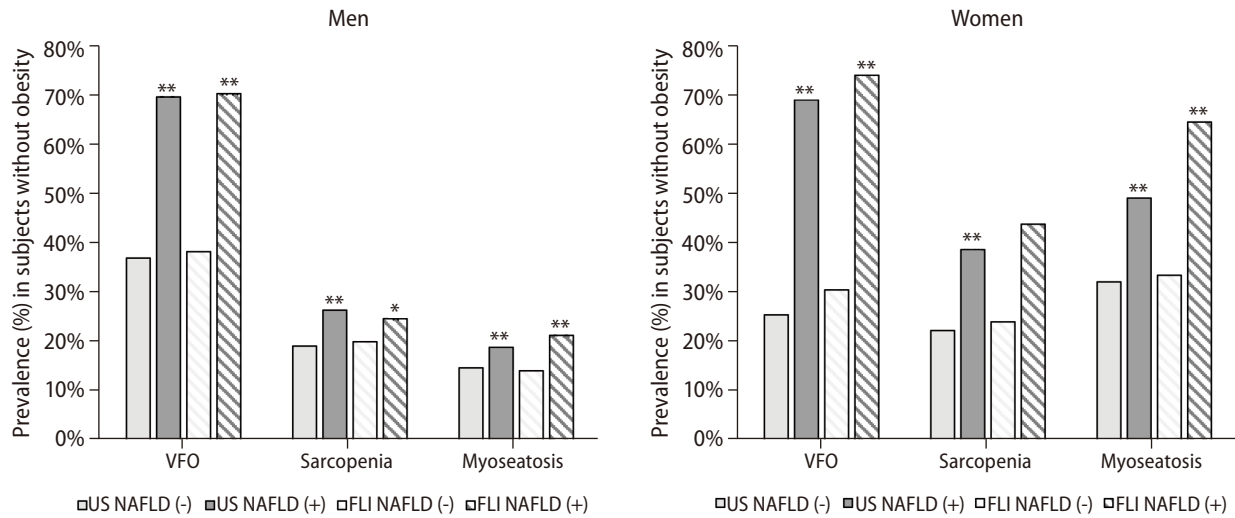

**Supplementary Figure 1.** Prevalence of Visceral fat obesity (VFO), sarcopenia, and myosteatosi s in NAFLD defined by ultrasonography (US) and the fatty liver index (FLI). Asterisk (\*) denotes comparison between controls and NAFLD without obesity (\*\* $P < 0.001$  and \* $P < 0.05$  by chi-squared test). NAFLD, non-alcoholic fatty liver disease.
