# Supplementary material for: Association of Visceral Fat Obesity, Sarcopenia, and Myosteatosis with Non-Alcoholic Fatty Liver Disease without Obesity
Source: PubMed Central journal article supplement — Clin Mol Hepatol. 2023 Jul 5;29(4):987–1001. doi: 10.3350/cmh.2023.0035 (PMC10577332; doi:10.3350/cmh.2023.0035), 2023-07-05
Supplement: cmh-2023-0035-Supplementary-Table-1.pdf [file cmh-2023-0035-Supplementary-Table-1.pdf]

**Supplementary Table 1.** Baseline participant characteristics

| Variable                        | Men               | Women             | P-value |
|---------------------------------|-------------------|-------------------|---------|
| Number (%)                      | 7,470 (51.9)      | 6,930 (48.1)      |         |
| Age (yr)                        | 53.7±9.2          | 53.3±8.7          | 0.008   |
| Height (cm)                     | 170.5±5.7         | 158.2±5.3         | <0.001  |
| Weight (kg)                     | 71.0±9.8          | 56.9±7.7          | <0.001  |
| BMI (kg/m <sup>2</sup> )        | 24.4±2.8          | 22.7±3.0          | <0.001  |
| Waist circumference (cm)        | 86.9±7.8          | 78.8±8.3          | <0.001  |
| ASM (kg)                        | 23.6±3.0          | 16.1±2.0          | <0.001  |
| ASM/height (kg/m <sup>2</sup> ) | 8.10±0.69         | 6.40±0.60         | <0.001  |
| ASM/weight (%)                  | 33.4±2.6          | 28.4±2.7          | <0.001  |
| ASM/BMI                         | 0.97±0.11         | 0.71±0.10         | <0.001  |
| PBF (%)                         | 21.6±5.2          | 29.4±6.3          | <0.001  |
| Smoking (%)                     |                   |                   | <0.001  |
| Current                         | 29.8              | 2.7               |         |
| Ex-smoker                       | 44.5              | 2.6               |         |
| Regular aerobic exercise (%)    | 46.1              | 47.6              | 0.066   |
| Resistance exercise (%)         | 39.2              | 25.4              | <0.001  |
| Hypertension (%)                | 36.8              | 23.6              | <0.001  |
| Diabetes (%)                    | 12.4              | 7.0               | <0.001  |
| NAFLD (%)                       | 42.0              | 23.2              | <0.001  |
| HOMA-IR                         | 1.17 (0.67, 1.81) | 0.99 (0.59, 1.57) | <0.001  |

Values are presented as mean±standard deviation or median (interquartile range).

BMI, body mass index; ASM, appendicular skeletal muscle mass; PBF, percent body fat; NAFLD, nonalcoholic fatty liver disease; HOMA-IR, homeostasis model assessment for insulin resistance.
