# Supplementary material for: Association of Visceral Fat Obesity, Sarcopenia, and Myosteatosis with Non-Alcoholic Fatty Liver Disease without Obesity
Source: PubMed Central journal article supplement — Clin Mol Hepatol. 2023 Jul 5;29(4):987–1001. doi: 10.3350/cmh.2023.0035 (PMC10577332; doi:10.3350/cmh.2023.0035), 2023-07-05
Supplement: cmh-2023-0035-Supplementary-Table-3.pdf [file cmh-2023-0035-Supplementary-Table-3.pdf]

**Supplementary Table 3.** Comparison of lifestyle factors and laboratory data according to the presence of NAFLD and obesity in women

| Variable                     | Without obesity   |                   | With obesity        |                     | P-value | P-value |
|------------------------------|-------------------|-------------------|---------------------|---------------------|---------|---------|
|                              | No NAFLD          | NAFLD             | No NAFLD            | NAFLD               |         |         |
| Number (%)                   | 4,673 (67.4)      | 883 (12.7)        | 647 (9.3)           | 727 (10.5)          |         |         |
| Age (yr)                     | 52.0±8.5          | 55.8±8.1          | 55.8±9.4            | 56.5±8.5            | <0.001  | 0.165   |
| Smoking (%)                  |                   |                   |                     |                     | 0.356   | 0.987   |
| Current                      | 2.6               | 3.0               | 2.5                 | 2.5                 |         |         |
| Ex-smoker                    | 2.8               | 2.0               | 2.5                 | 2.6                 |         |         |
| Regular aerobic exercise (%) | 49.3              | 45.1              | 48.1                | 39.5*               | 0.021   | 0.002   |
| Total METs (min/week)        | 960 (396, 1,980)  | 792 (297, 1,782)  | 918 (396, 1,980)    | 777 (198, 1,668)    | <0.001  | 0.010   |
| Resistance E (%)             | 27.6              | 23.6              | 21.5                | 17.2*               | 0.013   | 0.047   |
| SBP (mmHg)                   | 114.6±13.5        | 121.5±14.5        | 124.8±14.3**        | 127.9±14.6**        | <0.001  | <0.001  |
| DBP (mmHg)                   | 71.5±10.2         | 75.5±10.3         | 76.6±10.3*          | 78.6±9.8**          | <0.001  | <0.001  |
| FPG (mg/dL)                  | 93.7±11.4         | 103.4±19.4        | 98.1±13.0**         | 107.2±22.0**        | <0.001  | <0.001  |
| HbA1c (%)                    | 5.45±0.42         | 5.88±0.78         | 5.59±0.46**         | 5.98±0.75*          | <0.001  | <0.001  |
| LDL-C (mg/dL)                | 120.4±29.6        | 131.4±32.8        | 128.8±31.9          | 130.8±33.8          | <0.001  | 0.253   |
| HDL-C (mg/dL)                | 64.4±14.6         | 54.7±13.0         | 57.5±12.7*          | 52.6±11.6           | <0.001  | <0.001  |
| TG (mg/dL)                   | 76 (58, 103)      | 112 (84, 153)     | 91 (70, 124)**      | 121 (92, 160)*      | <0.001  | <0.001  |
| AST (IU/L)                   | 25.3±11.2         | 26.9±13.9         | 25.7±8.7*           | 29.6±14.0**         | <0.001  | <0.001  |
| ALT (IU/L)                   | 18.5±11.3         | 24.9±14.9         | 20.6±9.3*           | 30.3±19.7**         | <0.001  | <0.001  |
| r-GT (IU/L)                  | 13 (10, 17)       | 17 (13, 25)       | 15 (12, 20)**       | 20 (15, 30)**       | <0.001  | <0.001  |
| hsCRP (mg/dL)                | 0.03 (0.02, 0.06) | 0.05 (0.03, 0.11) | 0.05 (0.03, 0.12)   | 0.09 (0.05, 0.21)** | <0.001  | <0.001  |
| Insulin (μIU/L)              | 3.3 (2.2, 5.3)    | 5.9 (3.8, 7.8)    | 5.5 (3.5, 7.2)*     | 7.8 (5.8, 10.7)**   | <0.001  | <0.001  |
| HOMA-IR                      | 0.80 (0.49, 1.26) | 1.45 (0.93, 2.02) | 1.30 (0.81, 1.79)** | 2.02 (1.43, 2.92)** | <0.001  | <0.001  |
| Hypertension (%)             | 15.8              | 32.3              | 40.2*               | 48.4**              | <0.001  | 0.002   |
| Diabetes (%)                 | 3.0               | 17.3              | 6.3**               | 20.6                | <0.001  | <0.001  |
| Menopause (%)                | 47.3              | 63.0              | 56.7*               | 62.2                | <0.001  | 0.018   |

Values are presented as mean±standard deviation or median (interquartile range).

NAFLD, non-alcoholic fatty liver disease; MET, metabolic equivalent of task; SBP, systolic blood pressure; DBP, diastolic blood pressure; FPG, fasting plasma glucose; HbA1c, glycated hemoglobin; LDL, low-density lipoprotein; HDL, high-density lipoprotein; TG, triglyceride; hsCRP, high-sensitivity C-reactive protein; HOMA-IR, homeostasis model assessment for insulin resistance.

P-values represent comparisons between the groups with and without NAFLD by paired t-tests or Mann-Whitney U-tests for continuous variables and by chi-squared tests for categorical variables. The symbol (\*) denotes a comparison vs. the NAFLD without obesity group (\*P<0.05, \*\*P<0.001).
