# Supplementary material for: Association of Visceral Fat Obesity, Sarcopenia, and Myosteatosis with Non-Alcoholic Fatty Liver Disease without Obesity
Source: PubMed Central journal article supplement — Clin Mol Hepatol. 2023 Jul 5;29(4):987–1001. doi: 10.3350/cmh.2023.0035 (PMC10577332; doi:10.3350/cmh.2023.0035), 2023-07-05
Supplement: cmh-2023-0035-Supplementary-Table-4.pdf [file cmh-2023-0035-Supplementary-Table-4.pdf]

**Supplementary Table 4.** Odds ratios (OR) with 95% confidence intervals (CIs) for NAFLD according to the presence of obesity (with additional adjustment)

| Model                             |                               | Without obesity |           |         | With obesity |           |         |
|-----------------------------------|-------------------------------|-----------------|-----------|---------|--------------|-----------|---------|
|                                   |                               | OR              | 95% CI    | P-value | OR           | 95% CI    | P-value |
| For sarcopenia                    |                               |                 |           |         |              |           |         |
| Men                               | Sarcopenia                    | 1.21            | 0.90–1.61 | 0.207   | 1.09         | 0.84–1.34 | 0.512   |
|                                   | VFO                           | 3.37            | 2.91–3.92 | <0.001  | 1.78         | 1.50–2.12 | <0.001  |
|                                   | Diabetes                      | 2.12            | 1.71–2.63 | <0.001  | 2.52         | 1.95–3.26 | <0.001  |
|                                   | High CRP                      | 1.17            | 0.94–1.45 | 0.169   | 1.63         | 1.28–2.08 | <0.001  |
| Women                             | Sarcopenia                    | 1.49            | 1.13–1.96 | 0.005   | 1.13         | 0.88–1.47 | 0.338   |
|                                   | VFO                           | 4.75            | 4.01–5.64 | <0.001  | 2.92         | 2.25–3.78 | <0.001  |
|                                   | Diabetes                      | 3.63            | 2.76–4.77 | <0.001  | 3.49         | 2.25–3.78 | <0.001  |
|                                   | High CRP                      | 1.06            | 0.79–1.42 | 0.701   | 2.15         | 1.57–2.95 | <0.001  |
|                                   | Menopause                     | 1.71            | 1.27–2.32 | 0.020   | 1.60         | 1.03–2.47 | 0.035   |
| For myosteatorsis                 |                               |                 |           |         |              |           |         |
| Men                               | Myosteatorsis                 | 1.21            | 0.99–1.49 | 0.056   | 1.06         | 0.89–1.27 | 0.512   |
|                                   | VFO                           | 3.36            | 2.89–3.80 | <0.001  | 1.78         | 1.49–2.11 | <0.001  |
|                                   | Diabetes                      | 2.14            | 1.73–3.90 | <0.001  | 2.52         | 1.95–3.26 | <0.001  |
|                                   | High CRP                      | 1.16            | 0.93–1.44 | 0.194   | 1.78         | 1.49–2.11 | <0.001  |
| Women                             | Myosteatorsis                 | 1.26            | 1.06–1.49 | 0.009   | 0.92         | 0.70–1.20 | 0.538   |
|                                   | VFO                           | 4.66            | 3.93–5.54 | <0.001  | 2.88         | 2.22–3.73 | <0.001  |
|                                   | Diabetes                      | 3.62            | 2.76–4.76 | <0.001  | 3.45         | 2.34–5.09 | <0.001  |
|                                   | High CRP                      | 1.26            | 0.78–1.40 | 0.752   | 2.20         | 1.61–3.02 | <0.001  |
|                                   | Menopause                     | 1.69            | 1.26–2.29 | 0.011   | 1.62         | 1.05–2.90 | 0.037   |
| For sarcopenia with myosteatorsis |                               |                 |           |         |              |           |         |
| Men                               | Sarcopenia with myosteatorsis | 1.27            | 0.93–1.95 | 0.116   | 1.17         | 0.86–1.59 | 0.322   |
|                                   | VFO                           | 3.36            | 2.89–3.90 | <0.001  | 1.78         | 1.50–2.12 | <0.001  |
|                                   | Diabetes                      | 2.13            | 1.72–2.64 | <0.001  | 2.52         | 1.95–3.26 | <0.001  |
|                                   | High CRP                      | 1.56            | 0.93–1.44 | 0.970   | 1.62         | 1.27–2.07 | <0.001  |
| Women                             | Sarcopenia with myosteatorsis | 1.48            | 1.07–2.06 | 0.019   | 1.04         | 0.73–1.48 | 0.826   |
|                                   | VFO                           | 4.69            | 3.94–5.56 | <0.001  | 2.91         | 2.25–3.78 | <0.001  |
|                                   | Diabetes                      | 3.65            | 2.77–4.80 | <0.001  | 3.48         | 2.38–5.14 | <0.001  |
|                                   | High CRP                      | 1.05            | 0.78–1.40 | 0.757   | 2.16         | 1.58–2.97 | <0.001  |
|                                   | Menopause                     | 1.64            | 1.28–2.10 | <0.001  | 1.65         | 1.13–2.39 | 0.009   |

NAFLD, non-alcoholic fatty liver disease; VFO, visceral fat obesity; hsCRP, high-sensitivity C-reactive protein.

Adjusted for age, regular aerobic exercise, regular resistance exercise, VFO, diabetes, hypertension, high CRP, TG, HDL-cholesterol, menopausal status (only adjusted in women), and sarcopenia and/or myosteatorsis.
