# Supplementary material for: Association of Visceral Fat Obesity, Sarcopenia, and Myosteatosis with Non-Alcoholic Fatty Liver Disease without Obesity
Source: PubMed Central journal article supplement — Clin Mol Hepatol. 2023 Jul 5;29(4):987–1001. doi: 10.3350/cmh.2023.0035 (PMC10577332; doi:10.3350/cmh.2023.0035), 2023-07-05
Supplement: cmh-2023-0035-Supplementary-Table-5.pdf [file cmh-2023-0035-Supplementary-Table-5.pdf]

**Supplementary Table 5.** Odds ratios (OR) with 95% confidence intervals (CIs) for NAFLD defined by the FLI according to the presence of obesity in men and women

| Model |              | Without obesity |           |         | With obesity |           |         |
|-------|--------------|-----------------|-----------|---------|--------------|-----------|---------|
|       |              | OR              | 95% CI    | P-value | OR           | 95% CI    | P-value |
| Men   | Myosteatosis | 1.72            | 1.38–2.16 | <0.001  | 2.02         | 1.58–2.60 | <0.001  |
|       | VFO          | 3.05            | 2.56–3.64 | <0.001  | 2.07         | 1.66–2.59 | <0.001  |
|       | Diabetes     | 1.18            | 0.92–1.54 | 0.188   | 1.22         | 0.87–1.69 | 0.246   |
|       | High CRP     | 1.36            | 1.05–1.75 | 0.020   | 1.29         | 0.93–1.79 | 0.126   |
| Women | Myosteatosis | 2.77            | 2.02–3.80 | <0.001  | 1.93         | 1.36–2.60 | <0.001  |
|       | VFO          | 2.90            | 2.08–4.03 | <0.001  | 1.75         | 1.34–2.29 | <0.001  |
|       | Diabetes     | 2.29            | 1.52–3.47 | <0.001  | 2.68         | 1.80–3.97 | <0.001  |
|       | High CRP     | 1.46            | 0.91–2.33 | 0.117   | 2.11         | 1.52–2.93 | <0.001  |
|       | Menopause    | 1.97            | 1.23–3.80 | <0.001  | 0.85         | 0.57–1.26 | 0.420   |

NAFLD, non-alcoholic fatty liver disease; VFO, visceral fat obesity; FLI, fatty liver index; hsCRP, high-sensitivity C-reactive protein. Adjusted for age, regular aerobic exercise, regular resistance exercise, VFO, diabetes, hypertension, high CRP, TG, HDL-cholesterol, menopausal status (only adjusted in women), and myosteatosis.
